# Supplementary material for: Characteristic Human Individual Puffing Profiles Can Generate More TNCO than ISO and Health Canada Regimes on Smoking Machine When the Same Brand Is Smoked
Source: MDPI journal article supplement (doi:10.3390/ijerph17093225), 2020-05-06
Supplement: s1 [file s1]

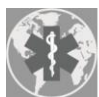

## Supplementary file B

Figure S1: Smoke escaping from the CReSSmicro™ device.

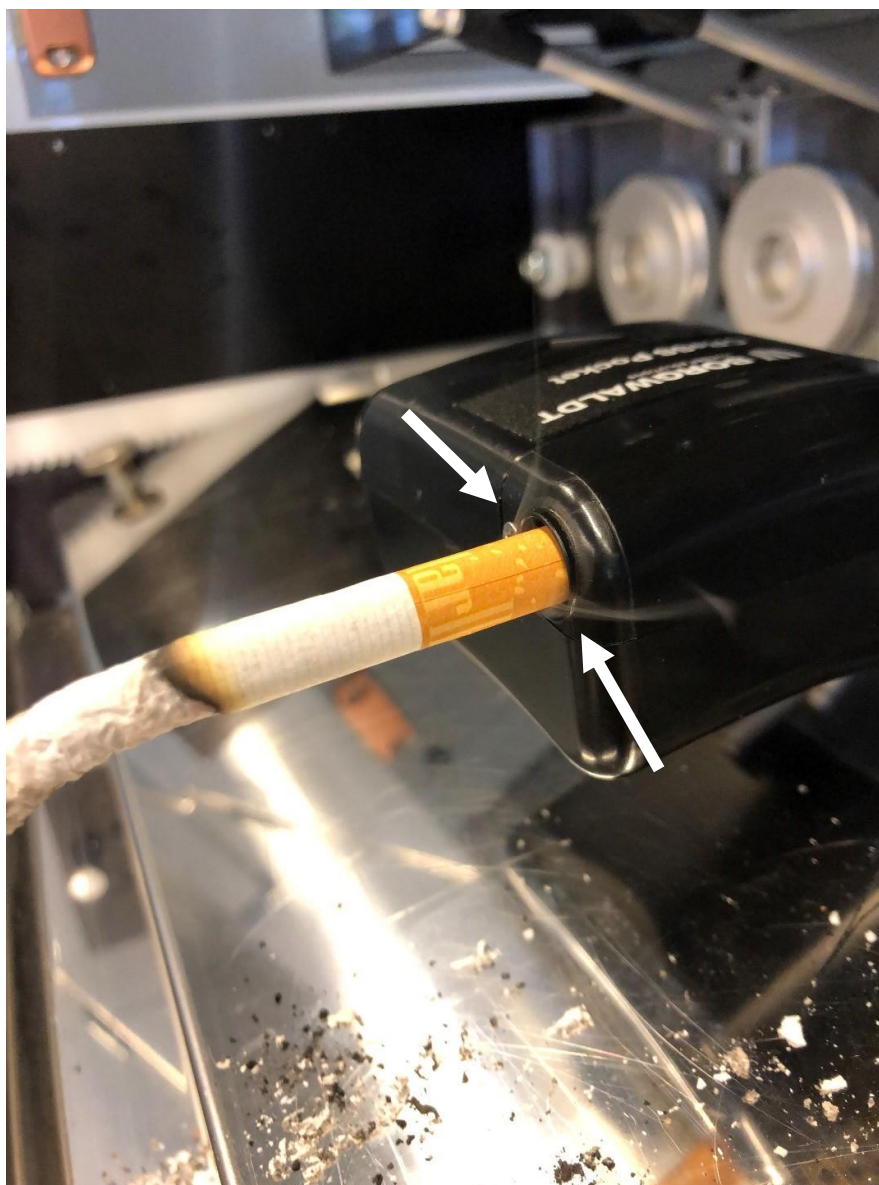

Figure S1: Smoke is escaping (arrow) during the smoking with a smoking machine. The cigarette was loosely inserted in the CReSSmicro™ device.
