# Supplementary material for: Characteristic Human Individual Puffing Profiles Can Generate More TNCO than ISO and Health Canada Regimes on Smoking Machine When the Same Brand Is Smoked
Source: MDPI journal article supplement (doi:10.3390/ijerph17093225), 2020-05-06
Supplement: s1 [file s1]

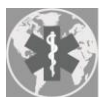

## Supplementary file A

Table S1: Literature reporting puffing parameters in chronological order since 2000.

Table S1: Literature reporting puffing parameters in chronological order since 2000

| Author                      | Year | Sort                                          | n   | Gender | Age  | SD           | No of cig/day | SD           | Puff volume (ml) | SD           | Puff duration (sec) | SD         | Puff flow | SD     | Puff interval (sec) | SD           | Puff count | SD           | Total volume (ml/cig) | SD         | Total volume /day | Fagerström index | SD         | Device                                                                 | Comments                            |
|-----------------------------|------|-----------------------------------------------|-----|--------|------|--------------|---------------|--------------|------------------|--------------|---------------------|------------|-----------|--------|---------------------|--------------|------------|--------------|-----------------------|------------|-------------------|------------------|------------|------------------------------------------------------------------------|-------------------------------------|
| Buchhalter <i>et al</i> [1] | 2000 | own brand (9.5 mg tar, 0.73 mg nicotine)      | 10  | ♂/♀    | 23.2 | 3.4          | 15.3          | 4.1          | 38.4             | 11.7         | 1.2                 | 0.4        | 32.0      |        | 35.0                | 17.9         | 10.3       | 2.1          | 395.5                 |            | 6.1               | 4.0              | 1.2        | CRSSPT                                                                 |                                     |
| Djordjevic <i>et al</i> [2] | 2000 | own brand (8.5 mg tar, 0.7 mg nicotine)       | 56  | ♂/♀    | 34.1 | CI 31.3-37.2 | 14.9          | CI 13.1-16.9 | 48.6             | CI 45.2-25.3 | 1.5                 | CI 1.4-1.7 | 32.4      |        | 21.3                | CI 19-23.8   | 12.7       | CI 11.8-13.6 | 615.0                 | CI 566-668 | 9.5               | 3.3              | CI 2.3-4.8 | Tobacco Smoke Inhalation Testing System                                |                                     |
|                             |      | own brand (15.4 mg tar, 1.11 mg nicotine)     | 77  | ♂/♀    | 34.7 | CI 32.5-37.1 | 15.9          | CI 14.3-17.8 | 44.1             | CI 40.8-46.8 | 1.5                 | CI 1.4-1.6 | 29.4      |        | 18.5                | CI 16.5-20.6 | 12.1       | CI 11.3-12.9 | 523.0                 | CI 487-561 | 8.2               | 3.8              | CI 2.7-5.3 | Tobacco Smoke Inhalation Testing System                                |                                     |
| Breland <i>et al</i> [3]    | 2002 | own brand (10.2 mg tar, 0.8 mg nicotine)      | 20  | ♂/♀    | 21.6 | SEM 1.1      | 18.9          | SEM 0.7      | 49.8             | SEM 3.3      | 1.7                 | SEM 0.1    | 29.3      |        |                     |              | 8          |              | 398.4                 |            | 7.5               | 5.6              | SEM 0.3    | Tobacco Smoke Inhalation Testing System                                | Fixed puff count                    |
| Breland <i>et al</i> [4]    | 2002 | own brand (9.4 mg tar, 0.73 mg nicotine)      | 18  | ♂/♀    | 25.8 | 6.0          | 20.7          | 4.7          | 56.5             | 11.2         | 1.8                 | 0.1        | 31.4      |        | 33.9                | 23.6         | 8          |              | 452.0                 |            | 9.4               | 5.3              | 1.6        | Tobacco Smoke Inhalation Testing System                                | Fixed puff count                    |
| Dixon <i>et al</i> [5]      | 2003 | test cigarette (9.5 mg tar, 0.77 mg nicotine) | 13  |        |      |              |               |              | 55.4             | 12.4         | 1.8                 | 0.8        | 31.7      |        | 20.9                | 4.4          | 16.0       | 2.6          | 877.0                 | 197.0      |                   |                  |            | Orifice-type holder/flowmeter (design of Creighton <i>et al.</i> 1978) |                                     |
|                             |      | test cigarette (8.8 mg tar, 0.48 mg nicotine) | 13  |        |      |              |               |              | 56.7             | 11.6         | 1.8                 | 0.8        | 31.5      |        | 20.8                | 3.6          | 16.1       | 3.0          | 890.0                 | 152.0      |                   |                  |            | Orifice-type holder/flowmeter (design of Creighton <i>et al.</i> 1978) |                                     |
|                             |      | test cigarette (8.7 mg tar, 0.81 mg nicotine) | 13  |        |      |              |               |              | 53.6             | 13.3         | 1.7                 | 0.8        | 31.7      |        | 21.4                | 5.3          | 14.4       | 2.3          | 755.0                 | 166.0      |                   |                  |            | Orifice-type holder/flowmeter (design of Creighton <i>et al.</i> 1978) |                                     |
|                             |      | test cigarette 8.1mg tar, 0.10 mg nicotine)   | 13  |        |      |              |               |              | 55.6             | 11.5         | 1.8                 | 0.7        | 31.4      |        | 21.1                | 4.5          | 14.4       | 2.3          | 766.0                 | 141.0      |                   |                  |            | Orifice-type holder/flowmeter (design of Creighton <i>et al.</i> 1978) |                                     |
|                             |      | test cigarette (7.7 mg tar, 0.22 mg nicotine) | 13  |        |      |              |               |              | 55.8             | 13.0         | 1.8                 | 0.8        | 30.3      |        | 20.0                | 3.7          | 15.6       | 3.3          | 870.0                 | 136.0      |                   |                  |            | Orifice-type holder/flowmeter (design of Creighton <i>et al.</i> 1978) |                                     |
| Lee <i>et al</i> [6]        | 2003 | own brand (16.7 mg tar, 1.2 mg nicotine)      | 7   | ♂/♀    | 37.0 | 25-44        | 25.0          | 10-38        | 30.8             | SE 3.5       | 0.9                 | SE 0.1     | 44.6      | SE 3.4 | 19.9                | SE 3.5       | 9.3        |              | 284.9                 |            | 7.1               | 6.8              | 4-10       | CRSSPT                                                                 | 8, 8, 11, 10 puffs                  |
|                             |      | own brand (12.8 mg tar, 1.0 mg nicotine)      | 10  | ♂/♀    | 24.5 | 20-37        | 25.0          | 17-40        | 45.1             | SE 4.9       | 1.2                 | SE 0.1     | 54.4      | SE 4.8 | 23.2                | SE 3.0       | 10.0       |              | 451.0                 |            | 11.3              | 6.0              | 3-9        | CRSSPT                                                                 |                                     |
| Aung <i>et al</i> [7]       | 2004 | own brand                                     | 56  | ♂/♀    | 15.4 | 1.3          | 19.6          | 8.93         | 38.1             | 14.5         | 1.1                 | 0.4        | 52.0      | 19.3   | 15.5                | 8.6          | 14.0       | 3.9          | 534.0                 |            | 10.5              | 7.4              | 1.4        | CRSSPT                                                                 | Current non-marijuana-smoking teens |
| Dixon <sup>s</sup>          | 2004 | 10 mg tar, 1 mg nicotine                      | 100 | ♂/♀    |      |              |               |              | 46.2             |              | 1.9                 |            | 24.2      |        | 24.7                |              | 12.6       |              | 558.0                 |            |                   |                  |            |                                                                        |                                     |
|                             |      | 4.8 mg tar, 0.5 mg nicotine                   | 100 | ♂/♀    |      |              |               |              | 58.6             |              | 1.9                 |            | 31.7      |        | 21.7                |              | 16.6       |              | 939.0                 |            |                   |                  |            |                                                                        |                                     |
|                             |      | 2.8 mg tar, 0.3 mg nicotine                   | 100 | ♂/♀    |      |              |               |              | 57.6             |              | 1.9                 |            | 30.6      |        | 19.7                |              | 15.0       |              | 844.0                 |            |                   |                  |            |                                                                        |                                     |
|                             |      | 1.2 mg tar, 0.1 mg nicotine                   | 100 | ♂/♀    |      |              |               |              | 63.4             |              | 1.9                 |            | 33.2      |        | 18.7                |              | 18.8       |              | 1135.0                |            |                   |                  |            |                                                                        |                                     |
| Dixon <sup>s</sup>          | 2004 | 5.6 mg tar, 0.5 mg nicotine                   | 50  | ♂/♀    |      |              |               |              | 52.8             |              | 1.7                 |            | 30.3      |        |                     |              | 12.5       |              | 644.0                 |            |                   |                  |            |                                                                        |                                     |
|                             |      | 1 mg tar, 0.1 mg nicotine                     | 50  | ♂/♀    |      |              |               |              | 63.2             |              | 1.7                 |            | 36.3      |        |                     |              | 15.1       |              | 901.0                 |            |                   |                  |            |                                                                        |                                     |
| Hughes <i>et al</i> [8]     | 2004 | own brand (Light, ultralight, regular)        | 34  | ♂/♀    | 48.0 |              | 30.0          | SEM 2        | 50.0             | SEM 2        |                     |            |           |        |                     |              | 12.7       | SEM 0.7      | 612.0                 | SEM 34     | 18.4              | 6.4              | 2.0        | CRSSPT                                                                 |                                     |

Table S1: Literature reporting puffing parameters in chronological order since 2000

| Author                      | Year | Sort                                                                                                | n   | Gender | age  | SD             | No of cig/day | SD           | Puff volume (ml) | SD             | Puff duration (sec) | SD           | Puff flow | SD     | Puff interval (sec) | SD             | Puff count | SD            | Total volume (ml/cig) | SD     | Total volume /day | Fagerström index | SD  | Device                   | Comments                                                            |
|-----------------------------|------|-----------------------------------------------------------------------------------------------------|-----|--------|------|----------------|---------------|--------------|------------------|----------------|---------------------|--------------|-----------|--------|---------------------|----------------|------------|---------------|-----------------------|--------|-------------------|------------------|-----|--------------------------|---------------------------------------------------------------------|
|                             |      | Omni light (12 mg tar, 0.8 mg nicotine) or Omni Full flavor King/100's (15 mg tar, 1.0 mg nicotine) | 34  | ♂/♀    | 48.0 |                | 31.0          | SEM 2        | 49.0             | SEM 2          |                     |              |           |        |                     |                | 11.6       | SEM 0.5       | 547.0                 | SEM 25 | 17.0              | 6.4              | 2.0 | CRSSPT                   |                                                                     |
| Lee <i>et al</i> [9]        | 2004 | own brand (14.5 mg tar, 1.1 mg nicotine)                                                            | 10  | ♂/♀    | 30.3 | 19-46          | 21.3          | 13-30        | 60.1             | 4.0            | 1.1                 |              | 57.1      | 3.5    |                     |                | 11.5       | 0.7           | 691.2                 |        | 14.7              | 5.4              | 3-9 | CRSSPT                   |                                                                     |
| Strasser <i>et al</i> [10]  | 2004 | own brand (mean 0.93mg nicotine)                                                                    | 113 | ♂/♀    | 45.8 | 10.7           | 21.2          | 7.8          | 54.8             | 16.9           | 1.6                 | 0.5          | 34.3      | 8.2    | 24.8                | 11.9           | 12.7       | 4.0           | 675.7                 | 244.7  | 14.3              | 5.5              | 2.1 | CRSSPT                   |                                                                     |
| Wood <i>et al</i> [11]      | 2004 | own brand                                                                                           | 24  | ♀      | 16.3 | 1.5            | 15.0          | 1-25         | 38.5             | 12.2           | 1.1                 | 0.3          | 35.0      |        | 24.1                | 9.9            | 12.7       | 6.2           | 504.4                 | 312.1  | 7.6               | 4.2              | 1.6 | CRSSPT                   |                                                                     |
|                             |      | own brand                                                                                           | 25  | ♂      | 16.4 | 1.4            | 15.0          | 1-25         | 45.8             | 14.6           | 1.2                 | 0.3          | 38.2      |        | 19.1                | 10.9           | 15.6       | 6.1           | 729.0                 | 393.5  | 10.9              | 4.6              | 1.7 | CRSSPT                   |                                                                     |
| Zimmerman <i>et al</i> [12] | 2004 | own brand                                                                                           | 92  | ♂/♀    | 15.2 | 1.5            |               |              | 38.2             | 12.5           | 1.1                 | 0.4          | 51.1      | 16.0   | 16.8                | 10.9           |            |               |                       |        |                   |                  |     | CRSSPT                   | volunteers cessation trial NIDA                                     |
| Hammond <i>et al</i> [13]   | 2005 | own brand (10-14 mg tar)                                                                            | 58  | ♂/♀    | 37.1 | 11.1           | 19.3          | 8.0          | 54.2             | 10.3           | 1.5                 | 0.2          | 38.1      | 5.6    | 33.5                | 17.6           | 11.3       | 3.4           | 612.0                 | 195.7  | 11.8              |                  |     | CRSSPT                   | trial 1                                                             |
|                             |      | own brand (10-14 mg tar)                                                                            | 58  | ♂/♀    | 37.1 | 11.1           | 19.3          | 8.0          | 52.3             | 12.4           | 1.4                 | 0.3          | 37.9      | 6.1    | 35.6                | 18.4           | 11.1       | 3.3           | 580.5                 | 206.9  | 11.2              |                  |     | CRSSPT                   | trial 2                                                             |
|                             |      | Matinee Extra Mild (4 mg tar, 0.8 mg nicotine)                                                      | 24  | ♂/♀    | 37.1 | 11.1           | 19.3          | 8.0          | 58.3             | 16.1           |                     |              |           |        |                     |                | 13.4       |               | 779.2                 | 331.0  | 15.0              |                  |     | CRSSPT                   | trial 3                                                             |
| Hitsman <i>et al</i> [14]   | 2005 | own brand (mean 0.8 mg nicotine)                                                                    | 8   | ♂/♀    | 35.5 | 16.9           | 18.8          | 2.3          |                  |                | 2.4                 | 0.7          |           |        | 36.8                | 17.2           | 10.8       | 3.6           |                       |        |                   | 5.6              | 1.7 | Videotaping + handtiming |                                                                     |
| Strasser <i>et al</i> [15]  | 2005 | Marlboro Light 100 HP (10 mg tar, 0.8 mg nicotine)                                                  | 12  | ♂/♀    | 21.6 | 4.5            | 17.5          | 12.5         | 63.4             | SE 8.4         | 1.6                 | SE 0.2       | 42.5      | SE 3.2 | 45                  |                | 8          |               | 507.2                 |        | 8.9               |                  |     | CRSS                     | Study 1, fixed puff count and IPI, unblocked                        |
|                             |      | Carlton 100 HP (1 mg tar, 0.1 mg nicotine)                                                          | 12  | ♂/♀    | 21.6 | 4.5            | 18.0          | 12.5         | 85.1             | SE 10.9        | 2.0                 | SE 0.3       | 44.5      | SE 2.8 | 45                  |                | 8          |               | 680.8                 |        | 12.3              |                  |     | CRSS                     | Study 1, fixed puff count and IPI, unblocked                        |
|                             |      | Carlton 100 HP (1 mg tar, 0.1 mg nicotine)                                                          | 12  | ♂      | 41.6 | 15.3           | 19.4          | 9.5          | 83.9             |                | 1.9                 |              | 62.2      |        | 45                  |                | 8          |               | 671.5                 |        | 13.0              | 4.0              | 2.6 | CRSS                     | Study 2, fixed puff count and IPI, unblocked, calculated mean (n=3) |
| Tidey <i>et al</i> [16]     | 2005 | own brand (mean 1.1 mg nicotine)                                                                    | 20  | ♂/♀    | 51.0 | 12.0           | 29.0          | 11           | 47.5             | 10.4           | 1.3                 | 0.2          | 36.5      |        | 42.0                | 21.5           | 8.9        | 2.3           | 429.0                 | 159.0  | 12.4              | 7.4              | 1.3 | CRSS                     |                                                                     |
| Breland <i>et al</i> [17]   | 2006 | own brand (9.89 mg tar, 0.74 mg nicotine)                                                           | 35  | ♂/♀    | 22.4 | CI 21.19-23.55 | 21.0          | CI 3.46-5.55 | 51.0             | CI 45.70-56.24 | 1.4                 | CI 1.24-1.52 | 36.9      |        | 30.7                | CI 26.48-34.99 | 10.0       | CI 8.85-11.21 | 511.2                 |        | 10.8              |                  |     | CRSS                     |                                                                     |

Table S1: Literature reporting puffing parameters in chronological order since 2000

| Author                     | Year | Sort                                               | n   | Gender | age  | SD           | No of cig/day | SD           | Puff volume (ml) | SD           | Puff duration (sec) | SD         | Puff flow | SD           | Puff interval (sec) | SD           | Puff count | SD           | Total volume (ml/cig) | SD         | Total volume /day | Fagerström index | SD           | Device             | Comments                               |
|----------------------------|------|----------------------------------------------------|-----|--------|------|--------------|---------------|--------------|------------------|--------------|---------------------|------------|-----------|--------------|---------------------|--------------|------------|--------------|-----------------------|------------|-------------------|------------------|--------------|--------------------|----------------------------------------|
| Franken <i>et al</i> [18]  | 2006 | own brand                                          | 66  | ♂/♀    | 15.1 | 1.3          | 19.0          | 8.4          | 36.0             | 13.5         | 1.1                 | 0.4        | 35.6      | 10.6         | 18.2                | 10.6         | 5          |              | 180.0                 |            | 3420.0            | 7.2              | 1.3          | CRess              | Fixed puff count                       |
| Hammond <i>et al</i> [19]  | 2006 | own brand (9-15 mg tar)                            | 51  | ♂/♀    | 37.1 |              | >5            |              | 53.3             | 11.9         | 1.4                 | 0.3        | 38.6      | 5.9          | 33.2                | 15.8         | 11.5       | 3.6          | 602.6                 | 195.8      | 3013.0            |                  |              |                    | Same data as Hammond <i>et al</i> [13] |
|                            |      | Matinee Extra Mild (4 mg tar, 0.4 mg nicotine)     | 21  | ♂/♀    | 37.1 |              | >5            |              | 60.7             | 15.6         | 1.6                 | 0.4        | 40.8      | 8.4          | 30.5                | 15.4         | 13.4       | 5.3          | 802.4                 | 346.2      | 4012.0            |                  |              |                    | Same data as Hammond <i>et al</i> [13] |
| Kassel <i>et al</i> [20]   | 2007 | Research cigarette (15.9 mg tar, 1.14 mg nicotine) | 16  | ♂/♀    | 17.5 | 1.1          | 3.4           | 1.2          | 45.4             | 22.2         | 1.1                 | 0.4        | 57.2      | 18.9         | 24.2                | 12.9         | 15.1       | 6.3          | 713.1                 | 461.8      | 2.4               | 2.2              | 1.4          | CRess              |                                        |
|                            |      | Research cigarette (17.9 mg tar, 0.06 mg nicotine) | 19  | ♂/♀    | 17.5 | 1.1          | 3.8           | 2            | 40.1             | 18.7         | 1.0                 | 0.4        | 53.4      | 19.0         | 23.0                | 13.2         | 23.2       | 8.9          | 988.8                 | 547.2      | 3.8               | 2.1              | 1.4          | CRess              |                                        |
| Melikian <i>et al</i> [21] | 2007 | own brand (10.1 mg tar, 1.92 mg nicotine)          | 129 | ♀      | 33.1 | CI 31.2-35   | 15.9          | CI 14.7-17.1 | 37.6             |              | 1.3                 |            | 28.3      |              | 20.4                |              | 13.5       |              | 507.8                 |            | 8.1               | 4.1              | CI 3.65-4.62 | puff analyzer [22] |                                        |
|                            |      | own brand (12.4 mg tar, 2.2 mg nicotine)           | 128 | ♂      | 35.0 | CI 33.3-36.9 | 16.8          | CI 15.5-18.2 | 45.8             |              | 1.5                 |            | 30.9      |              | 20.7                |              | 12.0       |              | 553.0                 |            | 9.3               | 4.6              | CI 4.12-5.06 | puff analyzer [22] |                                        |
| Strasser <i>et al</i> [23] | 2007 | own brand (mean 12.9 mg tar, 0.94 mg nicotine)     | 50  | ♂/♀    | 44.5 | 12.1         | 21.3          | 8.1          | 60.5             | CI 55.2-65.7 | 1.8                 | CI 1.6-1.9 | 35.5      | CI 22.3-37.8 | 21.6                | CI 19.1-24.1 | 14.3       | CI 12.8-15.7 | 832.0                 | CI 737-926 | 17.7              | 5.5              | 1.9          | CRess              |                                        |
|                            |      | Quest (10 mg tar, 0.6 mg nicotine)                 | 50  | ♂/♀    | 44.5 | 12.1         | 21.3          | 8.1          | 58.1             | CI 53.3-62.8 | 1.8                 | CI 1.6-1.9 | 34.5      | CI 32.0-37.0 | 21.6                | CI 19.0-24.2 | 9.8        | CI 9-10.8    | 540.3                 | CI 500-580 | 11.5              | 5.5              | 1.9          | CRess              |                                        |
|                            |      | Quest (10 mg tar, 0.3 mg nicotine)                 | 50  | ♂/♀    | 44.5 | 12.1         | 21.3          | 8.1          | 55.9             | CI 51.0-60.8 | 1.7                 | CI 1.5-1.8 | 34.4      | CI 31.9-37.0 | 19.6                | CI 16.9-22.3 | 9.9        | CI 8.9-10.9  | 518.1                 | CI 478-558 | 11.0              | 5.5              | 1.9          | CRess              |                                        |
|                            |      | Quest (10 mg tar, 0.05 mg nicotine)                | 50  | ♂/♀    | 44.5 | 12.1         | 21.3          | 8.1          | 59.4             | CI 54.6-64.3 | 1.8                 | CI 1.6-1.9 | 35.1      | CI 32.5-37.8 | 18.6                | CI 15.7-21.6 | 10.0       | CI 9.1-10.9  | 570.5                 | CI 527-614 | 12.2              | 5.5              | 1.9          | CRess              |                                        |
| Strasser <i>et al</i> [24] | 2007 | own brand                                          | 119 | ♂/♀    | 45.8 | 10.8         | 21.2          | 8.1          | 55.1             | 16.9         |                     |            |           |              |                     |              | 12.7       | 4.0          | 669.6                 | 243.1      | 14.2              | 5.5              | 2.1          | CRess              |                                        |
| Attwood <i>et al</i> [25]  | 2008 | own brand                                          | 55  | ♂/♀    | 22.0 | 4.0          | 11.0          | 5            | 49.0             | 12.0         | 1.6                 | 0.4        | 31.6      |              | 14.0                | 5.0          | 17.0       | 6.0          | 833.0                 |            | 9.2               | 4.0              | 2.0          | CRess              |                                        |
| Collins <i>et al</i> [26]  | 2008 | own brand                                          | 67  | ♂/♀    | 15.3 | 1.3          | >10           |              | 38.7             |              | 1.1                 |            | 48.1      |              |                     |              | 6          |              | 232.1                 |            | 2.3               | >5               |              | CRess              | Fixed puff count                       |
| Rees <i>et al</i> [27]     | 2008 | Marlboro Light (11 mg tar, 0.8 mg nicotine)        | 17  | ♂/♀    | 27.7 | CI 24.3-31.0 | 15.7          | CI 12.0-19.3 | 50.7             | 19.6         | 1.4                 | 0.5        | 37.6      |              | 32.1                | 11.9         | 11.4       | 3.0          | 578.0                 |            | 9.1               | 3.9              | CI 2.5-5.4   | CRess              | Supervised - Tampa group               |
|                            |      | Marlboro Light (11 mg tar, 0.8 mg nicotine)        | 17  | ♂/♀    | 27.7 | CI 24.3-31.0 | 15.7          | CI 12.0-19.3 | 51.2             | 17.3         | 1.4                 | 0.5        | 35.8      |              | 37.3                | 22.1         | 11.9       | 4.0          | 609.3                 |            | 9.6               | 3.9              | CI 2.5-5.4   | CRess              | Unsupervised - Tampa group             |

Table S1: Literature reporting puffing parameters in chronological order since 2000

| Author                    | Year | Sort                                                   | n   | Gender | age  | SD           | No of cig/day | SD           | Puff volume (ml) | SD   | Puff duration (sec) | SD  | Puff flow | SD  | Puff interval (sec) | SD   | Puff count | SD  | Total volume (ml/cig) | SD    | Total volume /day | Fagerström index | SD         | Device                | Comments                                                         |
|---------------------------|------|--------------------------------------------------------|-----|--------|------|--------------|---------------|--------------|------------------|------|---------------------|-----|-----------|-----|---------------------|------|------------|-----|-----------------------|-------|-------------------|------------------|------------|-----------------------|------------------------------------------------------------------|
|                           |      | Marlboro Light (11 mg tar, 0.8 mg nicotine)            | 15  | ♂/♀    | 27.8 | CI 35.5-32.1 | 15.9          | CI 9.5-22.2  | 47.4             | 16.9 | 1.3                 | 0.4 | 36.7      |     | 24.8                | 11.5 | 13.1       | 4.8 | 620.9                 |       | 9.9               | 4.4              | CI 3.0-5.8 | CReSS                 | Supervised - Salt Lake City group                                |
|                           |      | Marlboro Light (11 mg tar, 0.8 mg nicotine)            | 15  | ♂/♀    | 27.8 | CI 35.5-32.1 | 15.9          | CI 9.5-22.2  | 41.0             | 18.0 | 1.3                 | 0.5 | 32.3      |     | 26.8                | 10.4 | 11.9       | 4.7 | 487.9                 |       | 7.8               | 4.4              | CI 3.0-5.8 | CReSS                 | Unsupervised - Salt Lake City group                              |
|                           |      | Marlboro ultraLight (6 mg tar, 0.5 mg nicotine)        | 17  | ♂/♀    | 27.7 | CI 24.3-31.0 | 15.7          | CI 12.0-19.3 | 51.4             | 19.0 | 1.3                 | 0.4 | 38.9      |     | 33.0                | 14.9 | 11.3       | 2.6 | 580.8                 |       | 9.1               | 3.9              | CI 2.5-5.4 | CReSS                 | Supervised - Tampa group                                         |
|                           |      | Marlboro ultraLight (6 mg tar, 0.5 mg nicotine)        | 17  | ♂/♀    | 27.7 | CI 24.3-31.0 | 15.7          | CI 12.0-19.3 | 49.9             | 18.3 | 1.4                 | 0.5 | 35.6      |     | 35.1                | 15.3 | 10.5       | 2.6 | 524.0                 |       | 8.2               | 3.9              | CI 2.5-5.4 | CReSS                 | Unsupervised - Tampa group                                       |
|                           |      | Marlboro ultraLight (6 mg tar, 0.5 mg nicotine)        | 15  | ♂/♀    | 27.8 | CI 35.5-32.1 | 15.9          | CI 9.5-22.2  | 50.1             | 15.6 | 1.4                 | 0.4 | 36.3      |     | 21.8                | 10.4 | 13.9       | 5.6 | 696.4                 |       | 11.1              | 4.4              | CI 3.0-5.8 | CReSS                 | Supervised - Salt Lake City group                                |
|                           |      | Marlboro ultraLight (6 mg tar, 0.5 mg nicotine)        | 15  | ♂/♀    | 27.8 | CI 35.5-32.1 | 15.9          | CI 9.5-22.2  | 52.2             | 15.7 | 1.5                 | 0.5 | 34.8      |     | 24.7                | 12.3 | 12.1       | 4.6 | 631.6                 |       | 10.0              | 4.4              | CI 3.0-5.8 | CReSS                 | Unsupervised - Salt Lake City group                              |
|                           |      | Marlboro UltraSmooth (5 mg tar, 0.4 mg nicotine)       | 17  | ♂/♀    | 27.7 | CI 24.3-31.0 | 15.7          | CI 12.0-19.3 | 54.2             | 19.4 | 1.4                 | 0.4 | 39.0      |     | 28.4                | 8.4  | 10.2       | 2.9 | 552.8                 |       | 8.7               | 3.9              | CI 2.5-5.4 | CReSS                 | Activated carbon in filter - Supervised - Tampa group            |
|                           |      | Marlboro UltraSmooth (5 mg tar, 0.4 mg nicotine)       | 17  | ♂/♀    | 27.7 | CI 24.3-31.0 | 15.7          | CI 12.0-19.3 | 53.5             | 19.2 | 1.4                 | 0.5 | 37.4      |     | 33.6                | 15.8 | 9.3        | 2.4 | 497.6                 |       | 7.8               | 3.9              | CI 2.5-5.4 | CReSS                 | Activated carbon in filter - Unsupervised - Tampa group          |
|                           |      | Marlboro UltraSmooth (5 mg tar, 0.4 mg nicotine)       | 15  | ♂/♀    | 27.8 | CI 35.5-32.1 | 15.9          | CI 9.5-22.2  | 56.7             | 15.2 | 1.5                 | 0.4 | 38.6      |     | 23.9                | 9.2  | 12.5       | 5.0 | 708.8                 |       | 11.3              | 4.4              | CI 3.0-5.8 | CReSS                 | Activated carbon in filter - Supervised - Salt Lake City group   |
|                           |      | Marlboro UltraSmooth (5 mg tar, 0.4 mg nicotine)       | 15  | ♂/♀    | 27.8 | CI 35.5-32.1 | 15.9          | CI 9.5-22.2  | 54.6             | 19.4 | 1.5                 | 0.5 | 35.9      |     | 24.6                | 12.2 | 11.7       | 5.2 | 638.8                 |       | 10.2              | 4.4              | CI 3.0-5.8 | CReSS                 | Activated carbon in filter - Unsupervised - Salt Lake City group |
| Shahab <i>et al</i> [28]  | 2008 | own brand                                              | 131 | ♂/♀    | 31.4 | 10.4         | 13.4          | 5.7          | 54.2             | 14.0 | 1.5                 | 0.5 | 37.7      | 7.8 | 25.8                | 10.3 | 13.6       | 4.5 | 712.0                 | 232.0 | 9.5               | 2.3              | 1.4        | CReSS                 |                                                                  |
| Blank <i>et al</i> [29]   | 2009 | own brand (mean 14.9 mg tar, 1.1 mg nicotine)          | 30  | ♂/♀    | 32.3 | 11.0         | 19.6          | 4.7          | 44.4             | 13.6 | 1.7                 | 0.6 | 26.1      |     | 18.2                | 7.6  | 9.4        | 3.0 | 411.4                 | 170.7 | 8.1               | 6.0              | 2.0        | Portable CReSS        |                                                                  |
|                           |      | own brand (mean 14.9 mg tar, 1.1 mg nicotine)          | 30  | ♂/♀    | 32.3 | 11.0         | 19.6          | 4.7          | 57.0             | 20.1 | 1.7                 | 0.7 | 33.5      |     | 18.1                | 8.8  | 9.7        | 3.3 | 578.7                 | 327.2 | 8.1               | 6.0              | 2.0        | Desktop CReSS         |                                                                  |
|                           |      | Merit ultra-light (5 mg tar, 0.5 mg nicotine)          | 30  | ♂/♀    | 32.3 | 11.0         | 19.6          | 4.7          | 52.8             | 12.6 | 1.9                 | 0.6 | 27.8      |     | 16.7                | 7.7  | 10.1       | 3.4 | 528.5                 | 207.2 | 10.4              | 6.0              | 2.0        | Portable CReSS        |                                                                  |
|                           |      | Merit ultra-light (5 mg tar, 0.5 mg nicotine)          | 30  | ♂/♀    | 32.3 | 11.0         | 19.6          | 4.7          | 60.3             | 20.0 | 2.0                 | 0.8 | 30.2      |     | 15.2                | 7.2  | 10.2       | 3.1 | 614.2                 | 301.1 | 8.1               | 6.0              | 2.0        | Desktop CReSS         |                                                                  |
| Dickens <i>et al</i> [30] | 2009 | Research cigarette (Virginia tobacco, 8.8 mg nicotine) | 1   | ♂/♀    |      |              |               |              | 95.0             | 2.0  | 3.3                 | 0.2 | 29.5      | 2.4 |                     |      |            |     | 572.0                 |       |                   |                  |            | Smoker Analyser (SA7) |                                                                  |

Table S1: Literature reporting puffing parameters in chronological order since 2000

| Author                     | Year | Sort                                                    | n   | Gender | age  | SD   | No of cig/day | SD   | Puff volume (ml) | SD           | Puff duration (sec) | SD           | Puff flow | SD           | Puff interval (sec) | SD           | Puff count | SD           | Total volume (ml/cig) | SD             | Total volume /day | Fagerström index | SD  | Device                | Comments                                                              |
|----------------------------|------|---------------------------------------------------------|-----|--------|------|------|---------------|------|------------------|--------------|---------------------|--------------|-----------|--------------|---------------------|--------------|------------|--------------|-----------------------|----------------|-------------------|------------------|-----|-----------------------|-----------------------------------------------------------------------|
|                            |      |                                                         | 1   | ♂/♀    |      |      |               |      | 72.0             | 1.0          | 1.7                 | 0.3          | 40.7      | 1.7          |                     |              |            |              | 573.0                 |                |                   |                  |     | Smoker Analyser (SA7) |                                                                       |
|                            |      |                                                         | 1   | ♂/♀    |      |      |               |      | 63.0             | 13.0         | 1.9                 | 0.3          | 35.0      | 2.9          |                     |              |            |              | 376.0                 |                |                   |                  |     | Smoker Analyser (SA7) |                                                                       |
|                            |      |                                                         | 1   | ♂/♀    |      |      |               |      | 57.0             | 1.0          | 1.7                 | 0.1          | 34.5      | 1.1          |                     |              |            |              | 400.0                 |                |                   |                  |     | Smoker Analyser (SA7) |                                                                       |
|                            |      |                                                         | 1   | ♂/♀    |      |      |               |      | 119.0            | 7.0          | 2.6                 | 0.5          | 27.5      | 3.0          |                     |              |            |              | 717.0                 |                |                   |                  |     | Smoker Analyser (SA7) |                                                                       |
|                            |      |                                                         | 1   | ♂/♀    |      |      |               |      | 73.0             | 4.0          | 1.5                 | 0.2          | 35.0      | 0.9          |                     |              |            |              | 440.0                 |                |                   |                  |     | Smoker Analyser (SA7) |                                                                       |
|                            |      |                                                         | 1   | ♂/♀    |      |      |               |      | 55.0             | 5.0          | 3.3                 | 0.2          | 29.5      | 2.4          |                     |              |            |              | 441.0                 |                |                   |                  |     | Smoker Analyser (SA7) |                                                                       |
| Grainge <i>et al</i> [28]  | 2009 | regular                                                 | 130 | ♂/♀    | 31.4 | 10.5 | 13.6          | 6.1  | 56.2             | 13.8         | 1.6                 | 0.5          | 35.6      |              | 26.6                | 10.5         | 13.2       | 4.1          | 711.7                 | 208.3          | 9.7               |                  |     | Portable CReSS        |                                                                       |
| Moolchan <i>et al</i> [31] | 2009 | own brand                                               | 85  | ♂/♀    | 15.3 | 1.2  | 18.6          | 8.5  | 38.5             | 15.6         |                     |              |           |              |                     |              | 5          |              | 599.5                 | 201.6          | 11.1              | 7.0              | 1.2 | CReSS                 | Fixed puff count                                                      |
| Collins <i>et al</i> [32]  | 2010 | own brand                                               | 89  | ♂/♀    | 15.3 | 1.3  | 18.6          | 9.2  | 41.5             | 1.2          | 1.3                 | 0.0          | 53.9      | 2.0          | 14.5                | 0.7          | 15.2       |              | 630.8                 |                | 11.7              | 7.3              | 1.3 | CReSS                 |                                                                       |
| O'Connor <i>et al</i> [33] | 2010 | own brand (Newport, Marlboro, Camel)                    | 83  | ♂/♀    | 39.6 | 9.9  | 17.0          | 8.8  | 57.7             | CI 51.8-63.2 | 1.8                 | CI 1.57-1.97 | 36.5      | CI 33.4-39.7 | 17.6                | CI 14.8-20.5 | 14.4       | CI 13.1-15.7 | 828.0                 | CI 750-905     | 14.1              |                  |     | Portable CReSS        | Same data as June <i>et al</i> [34]                                   |
|                            |      | own brand (Newport, Marlboro, Camel)                    | 77  | ♂/♀    | 49.0 | 11.9 | 17.9          | 9.3  | 56.7             | CI 51.2-62.1 | 1.9                 | CI 1.70-2.08 | 31.5      | CI 28.5-34.6 | 21.3                | CI 18.6-24.0 | 13.7       | CI 12.5-15.0 | 611.0                 | CI 539-682     | 10.9              |                  |     | Portable CReSS        | Same data as June <i>et al</i> [34], Reduced Ignition Propensity type |
| June <i>et al</i> [35]     | 2011 | Own brand (Number 7, Peter Jackson, Players, DuMaurier) | 42  | ♂/♀    | 32.6 | 12.3 | 18.0          | 7.1  | 59.6             | CI 54.2-64.9 | 1.7                 | CI 1.6-1.9   | 36.8      | CI 33.8-39.8 | 19.2                | CI 17.0-21.4 | 14.1       | CI 12.7-15.5 | 834.9                 | CI 733.1-936.7 | 15.0              |                  |     | Portable CReSS        |                                                                       |
|                            |      | Own brand (Number 7, Peter Jackson, Players, DuMaurier) | 42  | ♂/♀    | 32.6 | 12.3 | 18.0          | 7.1  | 60.3             | CI 54.9-65.8 | 1.7                 | CI 1.6-1.9   | 37.2      | CI 34.9-39.6 | 17.9                | CI 15.1-20.6 | 14.2       | CI 12.6-15.9 | 831.7                 | CI 745.8-917.6 | 15.0              |                  |     | Portable CReSS        | Reduced Ignition Propensity type                                      |
| McKee <i>et al</i> [36]    | 2011 | own brand                                               | 37  | ♂/♀    | 37.7 | 10.6 | 18.4          | 7.96 |                  |              |                     |              |           |              | 32.9                |              | 9.7        |              |                       |                |                   | 6.1              | 2.3 | Portable CReSS        |                                                                       |
| Strasser <i>et al</i> [37] | 2011 | own brand                                               | 109 | ♂/♀    | 45.5 | 10.8 | 20.5          | 8.4  |                  |              |                     |              |           |              |                     |              |            |              | 785.1                 | 284.9          | 16.1              | 4.9              | 2.1 | Portable CReSS        |                                                                       |
| Veilleux <i>et al</i> [38] | 2011 | own brand                                               | 78  | ♂/♀    | 15.7 | 0.6  | 3.29          |      | 35.2             | 16.2         | 1.1                 | 0.4          | 43.6      | 15.6         | 19.2                | 8.9          | 16.5       | 6.1          | 582.7                 |                | 1.9               | 2.7              | 1.4 | Portable CReSS        | 23.06 cig/week                                                        |

Table S1: Literature reporting puffing parameters in chronological order since 2000

| Author                      | Year | Sort                                                                                                | n   | Gender | age  | SD   | No of cig/day | SD      | Puff volume (ml) | SD      | Puff duration (sec) | SD      | Puff flow | SD      | Puff interval (sec) | SD      | Puff count | SD      | Total volume (ml/cig) | SD      | Total volume /day | Fagerström index | SD     | Device                            | Comments                                               |
|-----------------------------|------|-----------------------------------------------------------------------------------------------------|-----|--------|------|------|---------------|---------|------------------|---------|---------------------|---------|-----------|---------|---------------------|---------|------------|---------|-----------------------|---------|-------------------|------------------|--------|-----------------------------------|--------------------------------------------------------|
| Williams <i>et al</i> [39]  | 2011 | own brand                                                                                           | 86  | ♂/♀    | 38.0 | 12.0 | 20.0          | 7.7     | 46.2             | SE 0.15 | 1.3                 | SE 0.01 | 37.1      | SE 0.1  | 21.0                | SE 0.14 | 12.3       | SE 0.15 | 540.5                 | SE 7.01 | 10.8              | 5.5              | 1.9    | Portable CReSS                    | control group, same data as Williams <i>et al</i> [40] |
| Brinkman <i>et al</i> [41]  | 2012 | Kent 100 (non-menthol)                                                                              | 9   | ♂/♀    | 23.0 | 3.5  | 16.9          | SEM 0.7 | 53.9             | SEM 1.0 | 2.2                 | SEM 0.1 | 28.1      | SEM 0.6 | 30.6                | SEM 0.6 | 10.8       | SEM 0.5 | 563.0                 | SEM 20  | 9.5               |                  |        | Sodim SPA-D Smoking Puff Analyzer |                                                        |
| Faulkner <i>et al</i> [42]  | 2012 | own brand                                                                                           | 18  | ♂/♀    | 24.6 | 5.9  | 15.2          | 4.6     | 54.7             | 16.7    | 1.8                 | 0.6     | 30.8      |         | 11.9                | 5.1     | 16.5       | 6.3     | 903.2                 |         | 13.7              | 4.5              | 2.3    | Portable CReSS                    |                                                        |
|                             |      | Benson & Hedges Light 100 (menthol)                                                                 | 9   | ♂/♀    | 23.0 | 3.5  | 15.2          | SEM 0.8 | 54.7             | SEM 0.8 | 2.4                 | SEM 0.1 | 25.6      | SEM 0.5 | 25.6                | SEM 0.5 | 11.6       | SEM 0.5 | 636.0                 | SEM 27  | 9.7               |                  |        | Sodim SPA-D Smoking Puff Analyzer |                                                        |
| Perkins <i>et al</i> [43]   | 2012 | own brand                                                                                           | 94  | ♂/♀    | 26.8 | SE 1 | 19.5          | SE 0.6  |                  |         |                     |         |           |         |                     |         | 12.6       |         | 568.7                 |         | 11.1              | 4.7              | SE 0.2 | Portable CReSS                    |                                                        |
| Matsumoto <i>et al</i> [44] | 2013 | Top 10 brands Japan                                                                                 | 101 | ♂/♀    | 40.0 | 11.0 | 18.4          | 7.5     | 54.3             | 14.1    |                     |         |           |         |                     |         | 14.5       | 3.6     | 767.2                 | 259.5   | 14.5              |                  |        | Portable CReSS                    |                                                        |
|                             |      | Pianissimo, Mild Seven One (1 mg tar, 0.1 mg nicotine)                                              | 14  | ♂/♀    | 39.2 | 10.2 | 18.7          | 8.3     | 64.6             | 12.3    |                     |         |           |         |                     |         | 17.9       | 3.2     | 1160.1                | 302.7   | 22.6              |                  |        | Portable CReSS                    |                                                        |
|                             |      | Mild Seven One Extra Lights, Caster Mild, Mild Seven Super Lights (3-6 mg tar, 0.3-0.5 mg nicotine) | 38  | ♂/♀    | 40.1 | 12.6 | 17.8          | 7.2     | 56.0             | 12.2    |                     |         |           |         |                     |         | 15.0       | 3.1     | 810.0                 | 179.6   | 14.4              |                  |        | Portable CReSS                    |                                                        |
|                             |      | Cabin Mild, Mild Seven Lights, Mild Seven Original (8-10 mg tar, 0.6-0.8 mg nicotine)               | 27  | ♂/♀    | 41.9 | 11.2 | 18.2          | 6.6     | 46.9             | 12.3    |                     |         |           |         |                     |         | 13.4       | 3.4     | 609.4                 | 158.7   | 11.4              |                  |        | Portable CReSS                    |                                                        |
|                             |      | Hope, Seven Stars (14 mg tar, 1.1-1.2 mg nicotine)                                                  | 22  | ♂/♀    | 38.0 | 8.4  | 19.3          | 8.8     | 53.9             | 15.8    |                     |         |           |         |                     |         | 12.6       | 3.1     | 638.7                 | 136.9   | 13.0              |                  |        | Portable CReSS                    |                                                        |
| McClure <i>et al</i> [45]   | 2013 | own brand                                                                                           | 135 | ♀      | 31.9 | 7.6  | 16.2          | 7       | 49.9             | 15.8    | 1.6                 | 0.5     | 32.7      | 9.1     |                     |         | 11.7       | 3.9     | 583.8                 |         | 9.5               | 4.9              | 2.2    | Portable CReSS                    |                                                        |
| Strasser <i>et al</i> [46]  | 2013 | own brand                                                                                           | 78  | ♂/♀    | 38.4 | 11.7 | 18.0          | 8       | 54.7             |         | 1.7                 | 0.1     | 32.2      |         | 30.1                | 2.1     | 11.2       | 0.6     | 612.6                 | 74.6    | 11.0              | 5.8              | 1.8    | Portable CReSS                    | Day 1 - cigarette 1                                    |
|                             |      | own brand                                                                                           | 78  | ♂/♀    | 38.4 | 11.7 | 18.0          | 8       | 46.7             |         | 1.7                 | 0.1     | 27.4      |         | 33.7                | 3.2     | 11.1       | 0.8     | 517.9                 | 36.8    | 9.3               | 5.8              | 1.8    | Portable CReSS                    | Day 1 - cigarette 2                                    |
|                             |      | own brand                                                                                           | 78  | ♂/♀    | 38.4 | 11.7 | 18.0          | 8       | 44.5             |         | 1.6                 | 0.1     | 27.8      |         | 31.4                | 3.0     | 12.6       | 0.7     | 560.7                 | 42.7    | 10.1              | 5.8              | 1.8    | Portable CReSS                    | Day 5                                                  |
| Tidey <i>et al</i> [47]     | 2013 | own brand                                                                                           | 26  | ♂/♀    | 44.5 | 10.9 | 23.5          | 6.5     |                  |         |                     |         |           |         |                     |         |            |         | 1451.0                | 835.0   | 34.1              | 6.7              | 1.8    | Desktop CReSS                     |                                                        |

Table S1: Literature reporting puffing parameters in chronological order since 2000

| Author                      | Year | Sort                                            | n   | Gender | age   | SD     | No of cig/day | SD     | Puff volume (ml) | SD          | Puff duration (sec) | SD           | Puff flow | SD          | Puff interval (sec) | SD          | Puff count | SD      | Total volume (ml/cig) | SD            | Total volume /day | Fagerström index | SD  | Device                            | Comments                                             |
|-----------------------------|------|-------------------------------------------------|-----|--------|-------|--------|---------------|--------|------------------|-------------|---------------------|--------------|-----------|-------------|---------------------|-------------|------------|---------|-----------------------|---------------|-------------------|------------------|-----|-----------------------------------|------------------------------------------------------|
| Hammond <i>et al</i> [48]   | 2014 | own brand                                       | 72  | ♂/♀    | 37.2  | 11.9   | 16.1          | 6.3    | 63.5             | 22.4        |                     |              |           |             |                     |             | 16.1       | 6.3     | 977.9                 | 420.8         | 15.7              | 4.9              | 2.3 | Portable CReSS                    |                                                      |
|                             |      | Quest 1 (0.6 mg nicotine)                       | 71  | ♂/♀    | 37.2  | 11.9   | 14.5          | 4.6    | 64.3             | 22.3        |                     |              |           |             |                     |             | 14.5       | 4.6     | 910.1                 | 520.3         | 13.2              | 4.8              | 2.2 | Portable CReSS                    |                                                      |
|                             |      | Quest 2 (0.3 mg nicotine)                       | 71  | ♂/♀    | 37.2  | 11.9   | 13.8          | 4.3    | 64.2             | 17.2        |                     |              |           |             |                     |             | 13.8       | 4.3     | 834.2                 | 190.4         | 11.5              | 4.8              | 2.1 | Portable CReSS                    |                                                      |
|                             |      | Quest 3 (0.05 mg nicotine)                      | 72  | ♂/♀    | 37.2  | 11.9   | 13.2          | 4.5    | 69.3             | 18.8        |                     |              |           |             |                     |             | 13.2       | 4.5     | 890.7                 | 353.6         | 11.8              | 4.4              | 2.3 | Portable CReSS                    |                                                      |
| Norton <i>et al</i> [49]    | 2014 | own brand                                       | 16  | ♂/♀    | 45.5  | SE 3.5 | 16.1          | SE 1.4 | 67.5             | SE 6.3      | 3.0                 | SE 1         | 36.1      | SE 1.8      | 21.3                | SE 6.2      | 13.2       | SE 1.1  | 829.0                 | SE 51.4       | 13.3              |                  |     | Portable CReSS                    |                                                      |
| Schneider <i>et al</i> [50] | 2014 | own brand                                       | 25  | ♂/♀    | 45.9  | 12.4   | 16.7          | 4.6    | 62.2             | 18.5        | 1.7                 | 0.5          | 36.8      |             | 18.7                | 7.7         | 10.2       | 2.7     | 635.5                 |               | 10.6              | 5.6              | 2.0 | Portable CReSS                    |                                                      |
|                             |      | own brand                                       | 25  | ♂/♀    | 45.9  | 12.4   | 16.7          | 4.6    | 58.8             | 18.3        | 1.6                 | 0.4          | 36.3      |             | 19.2                | 7.6         | 11.4       | 2.7     | 667.5                 |               | 11.2              | 5.6              | 2.0 | Portable CReSS                    |                                                      |
|                             |      | own brand                                       | 23  | ♂/♀    | 39.1  | 13.8   | 15.6          | 4.22   | 55.3             | 18.5        | 1.7                 | 0.4          | 31.8      |             | 14.3                | 5.0         | 14.2       | 4.7     | 783.6                 |               | 12.2              | 4.2              | 1.9 | Portable CReSS                    |                                                      |
|                             |      | own brand                                       | 23  | ♂/♀    | 39.1  | 13.8   | 15.6          | 4.22   | 54.8             | 16.9        | 1.7                 | 0.5          | 32.2      |             | 15.0                | 5.5         | 13.9       | 5.6     | 763.9                 |               | 11.9              | 4.2              | 1.9 | Portable CReSS                    | after 10 minutes exercise                            |
| Appleton <i>et al</i> [51]  | 2015 | own brand (>13 mg tar)                          | 20  | ♂      | 35.3  | 6.1    | 10-30         |        | 69.7             | 18.6        | 2.3                 | 0.6          | 30.3      |             | 38.6                | 10.8        | 9.8        | 2.3     | 683.1                 |               | 6.8               |                  |     | Portable CReSS                    | Total volume if 10 cig/day                           |
|                             |      | Test cigarette High Tar (~15 mg tar)            | 20  | ♂      | 35.4  | 6.4    | 22.4-24.0     |        | 59.4             | 18.3        | 2.0                 | 0.6          | 29.4      |             | 37.2                | 10.2        | 8.9        | 2.2     | 528.4                 |               | 11.8              |                  |     | Portable CReSS                    | Total volume if 22.4 cig/day                         |
|                             |      | Test Cigarette Low tar (~7 mg tar)              | 19  | ♂      | 35.1  | 6.2    | 20.5-22.6     |        | 69.3             | 19.2        | 2.4                 | 0.7          | 29.5      |             | 33.3                | 9.0         | 9.5        | 2.5     | 658.4                 |               | 13.5              |                  |     | Portable CReSS                    | Total volume if 20.5 cig/day                         |
| Brinkman <i>et al</i> [52]  | 2015 | GPC Full flavor and GPC Ultra Light             | 24  | ♂/♀    | 18-30 |        | >20           |        | 55.6             | 53.71-57.49 | 2.1                 | 2.042-2.198  | 27.2      | 26.22-28.21 | 19.3                | 18.48-20.14 | 11.6       |         | 643.8                 | 627.2-660.9   | 12.9              |                  |     | Sodim SPA-D Smoking Puff Analyzer | Based on puff profiles of Brinkman <i>et al</i> [41] |
|                             |      | GPC Full flavor (15.2 mg tar, 0.97 mg nicotine) | 24  | ♂/♀    | 18-30 |        | >20           |        | 51.9             | 49.42-54.45 | 2.0                 | CI 1.9-2.13  | 26.7      | 25.40-28.04 | 21.0                | 19.87-22.20 | 11.5       |         | 598.5                 | 579.84-617.77 | 12.0              |                  |     | Sodim SPA-D Smoking Puff Analyzer | Based on puff profiles of Brinkman <i>et al</i> [41] |
|                             |      | GPC Ultra Light (5.8 mg tar, 0.51 mg nicotine)  | 24  | ♂/♀    | 18-30 |        | >20           |        | 59.6             | 56.94-62.37 | 2.2                 | CI 2.14-2.34 | 27.7      | 26.27-29.27 | 17.7                | 16.59-18.86 | 11.6       |         | 693.4                 | 666.79-721.06 | 13.9              |                  |     | Sodim SPA-D Smoking Puff Analyzer | Based on puff profiles of Brinkman <i>et al</i> [41] |
| Chung <i>et al</i> [53]     | 2015 | own brand - white                               | 26  | ♂      | 39.2  | 10.1   | >12           |        | 57.2             | SE 2.69     | 1.6                 | SE 0.06      | 37.1      | SE 1.70     | 25.0                | SE 1.52     | 12.3       | SE 0.61 | 700.8                 |               | 8.4               | 5.8              | 2.1 | Portable CReSS                    |                                                      |
|                             |      | own brand- korean                               | 27  | ♂      | 37.3  | 9.7    | 12.0          | 1.82   | 59.6             | SE 3        | 1.5                 | SE 0.07      | 42.1      | SE 1.94     | 13.5                | SE 1.7      | 13.8       | SE 0.69 | 820.6                 |               | 9.8               | 4.6              | 2.1 | Portable CReSS                    |                                                      |
| Gass <i>et al</i> [54]      | 2016 | own brand                                       | 107 | ♂/♀    | 25.0  | 5.9    | 2.7           | 2.2    | 31.4             | 13.0        | 1.2                 | 0.5          | 26.8      | 7.9         | 28.8                | 45.4        | 13.5       | 4.5     | 413.6                 | 182.2         | 1.1               | 1.1              | 1.5 | Portable CReSS                    |                                                      |
| Krebs <i>et al</i> [55]     | 2016 | own brand                                       | 332 | ♂/♀    | 37.6  | 11.6   | 16.5          | 6.2    | 48.2             | 14.9        | 1.6                 | 0.4          | 34.0      | 1.3         | 26.6                | 23.8        | 12.2       | 4.8     | 588.0                 |               | 5526.6            | 4.4              | 2.3 | SPA-M                             | Pennsylvania Adult Smoking Study, same               |



Table S1: Literature reporting puffing parameters in chronological order since 2000

| Author                         | Year | Sort                                | n   | Gender | age  | SD   | No of cig/day | SD          | Puff volume (ml) | SD          | Puff duration (sec) | SD           | Puff flow | SD   | Puff interval (sec) | SD          | Puff count | SD             | Total volume (ml/cig) | SD            | Total volume /day | Fagerström index | SD  | Device         | Comments                                            |
|--------------------------------|------|-------------------------------------|-----|--------|------|------|---------------|-------------|------------------|-------------|---------------------|--------------|-----------|------|---------------------|-------------|------------|----------------|-----------------------|---------------|-------------------|------------------|-----|----------------|-----------------------------------------------------|
|                                |      |                                     |     |        |      |      |               |             |                  |             |                     |              |           |      |                     |             |            |                |                       |               |                   |                  |     |                | study as Chen <i>et al</i> [56]                     |
| Mercincagave <i>et al</i> [57] | 2016 | Own brand                           | 63  | ♂/♀    | 40.7 | 12.7 | 19.3          | 17.68-20.98 | 56.5             | 52.45-60.47 | 1.8                 | CI 1.63-1.89 | 32.1      |      | 24.4                | 21.34-27.40 | 13.8       | CI 12.63-14.88 | 756.0                 | 690.68-821.34 | 14.6              | 5.6              | 1.9 | Portable CReSS | same study as Mercincagave <i>et al</i> [58]        |
|                                |      | Quest 1 (0.6 mg nicotine)           | 63  | ♂/♀    | 40.7 | 12.7 | 22.6          | 20.93-24.36 | 52.2             | 48.13-56.30 | 1.7                 | CI 1.53-1.79 | 31.5      |      | 20.9                | 18.36-23.46 | 10.8       | CI 9.87-11.81  | 541.0                 | 489.42-592.51 | 12.2              | 5.6              | 1.9 | Portable CReSS | same study as Mercincagave <i>et al</i> [58]        |
|                                |      | Quest 2 (0.3 mg nicotine)           | 63  | ♂/♀    | 40.7 | 12.7 | 24.2          | 22.35-26.01 | 52.7             | 48.91-56.37 | 1.8                 | CI 1.61-1.88 | 30.1      |      | 19.1                | 16.51-21.58 | 10.9       | CI 9.92-11.91  | 545.1                 | 499.34-590.86 | 13.2              | 5.6              | 1.9 | Portable CReSS | same study as Mercincagave <i>et al</i> [58]        |
|                                |      | Quest 3 (0.05 mg nicotine)          | 63  | ♂/♀    | 40.7 | 12.7 | 20.6          | 18.53-22.58 | 61.1             | 57.18-65.08 | 1.9                 | CI 1.79-2.05 | 31.8      |      | 17.5                | 15.04-19.91 | 11.8       | CI 10.63-12.88 | 691.1                 | 632.34-749.91 | 14.2              | 5.6              | 1.9 | Portable CReSS | same study as Mercincagave <i>et al</i> [58]        |
| Pulcu <i>et al</i> [59]        | 2016 | own brand                           | 110 | ♂/♀    | 28.2 | 9.4  | 15.8          | 6.2         |                  |             |                     |              |           |      | 26.6                | 11.4        | 14.4       | 4.0            |                       |               |                   |                  |     | Portable CReSS |                                                     |
| Ross <i>et al</i> [60]         | 2016 | own brand                           | 59  | ♂/♀    | 34.9 | 10.1 | 14.0          | 6.4         | 45.9             | 16.6        | 1.5                 | 0.1          | 31.3      | 8.4  | 21.4                | 9.4         | 12.4       | 3.9            | 536.4                 | 117.0         | 7.5               | 5.1              | 2.0 | Portable CReSS | first cigarette of the day                          |
|                                |      |                                     | 59  | ♂/♀    | 34.9 | 10.1 | 14.0          | 6.4         | 46.6             | 16.0        | 1.5                 | 0.5          | 32.1      | 8.8  | 19.4                | 8.4         | 12.9       | 4.0            | 554.5                 | 164.7         | 7.8               | 5.1              | 2.0 | Portable CReSS | after 4 hours ad libitum smoking                    |
|                                |      |                                     | 30  | ♂      | 35.5 | 11.1 | 14.6          | 6.9         | 50.9             | 17.7        | 1.7                 | 0.5          | 31.4      | 10.5 | 21.2                | 7.3         | 11.4       | 2.8            | 559.5                 | 200.9         | 8.2               | 4.5              | 2.0 | Portable CReSS | first cigarette of the day                          |
|                                |      |                                     | 30  | ♂      | 35.5 | 11.1 | 14.6          | 6.9         | 52.2             | 17.6        | 1.7                 | 0.5          | 31.9      | 11.0 | 18.7                | 8.4         | 12.2       | 3.2            | 582.2                 | 171.8         | 8.5               | 4.5              | 2.0 | Portable CReSS | after 4 hours ad libitum smoking                    |
|                                |      |                                     | 29  | ♀      | 34.4 | 9.2  | 13.4          | 5.9         | 40.7             | 13.7        | 1.4                 | 0.4          | 31.1      | 5.8  | 21.6                | 11.3        | 13.4       | 4.6            | 512.5                 | 148.1         | 6.9               | 5.7              | 1.8 | Portable CReSS | first cigarette of the day                          |
|                                |      |                                     | 29  | ♀      | 34.4 | 9.2  | 13.4          | 5.9         | 40.9             | 12.0        | 1.3                 | 0.4          | 32.2      | 5.9  | 20.0                | 8.4         | 13.7       | 4.7            | 526.7                 | 155.3         | 7.1               | 5.7              | 1.8 | Portable CReSS | after 4 hours ad libitum smoking                    |
| Ross <i>et al</i> [61]         | 2016 | own brand (non-menthol)             | 58  | ♂/♀    | 40.0 | 13.2 | 11.8          | 5.62        | 82.9             |             | 2.1                 | 0.5          | 39.9      | 8.3  |                     |             | 14.6       | 4.6            | 1213.3                |               | 14.4              | 4.0              | 2.3 | Portable CReSS |                                                     |
| Tidey <i>et al</i> [62]        | 2016 | own brand                           | 23  | ♂/♀    | 45.0 | 11.1 | 23.3          | 6.2         | 44.0             |             | 1.4                 |              | 31.4      |      | 35.0                |             | 11.0       |                | 500.0                 |               | 11.7              |                  |     | Portable CReSS | Graph data, originates from Tidey <i>et al</i> [47] |
| Farris <i>et al</i> [63]       | 2017 | own brand                           | 64  | ♂/♀    | 44.3 | 9.5  | 14.8          | 5.47        | 63.2             | 24.4        | 1.8                 | 0.6          | 35.9      |      | 14.3                | 5.4         | 20.4       | 7.4            | 1290.1                |               | 19.1              | 4.6              | 1.5 | Portable CReSS |                                                     |
| Higgins <i>et al</i> [64]      | 2017 | SPECTRUM 15.8 mg nicotine/g tobacco | 26  | ♂/♀    | 36.7 | 10.8 | 17.5          | 10.15       | 38.9             | 15.1        | 1.4                 | 0.4          | 28.8      |      | 19.9                | 9.3         | 15.0       | 8.3            | 463.8                 | 211.9         | 8.1               | 5.2              | 2.7 | Desktop CReSS  |                                                     |
|                                |      | SPECTRUM 5.2 mg nicotine/g tobacco  | 26  | ♂/♀    | 36.7 | 10.8 | 17.5          | 10.16       | 35.6             | 16.1        | 1.2                 | 0.5          | 28.9      |      | 27.8                | 24.2        | 12.0       | 5.0            | 370.7                 | 212.2         | 6.5               | 5.2              | 2.7 | Desktop CReSS  |                                                     |
|                                |      | SPECTRUM 2.4 mg nicotine/g tobacco  | 26  | ♂/♀    | 36.7 | 10.8 | 17.5          | 10.17       | 41.5             | 12.6        | 1.4                 | 0.4          | 29.9      |      | 21.0                | 8.2         | 11.3       | 3.2            | 444.4                 | 200.1         | 7.8               | 5.2              | 2.7 | Desktop CReSS  |                                                     |
|                                |      | SPECTRUM 0.4 mg nicotine/g tobacco  | 26  | ♂/♀    | 36.7 | 10.8 | 17.5          | 10.18       | 38.6             | 12.5        | 1.4                 | 0.4          | 28.0      |      | 21.3                | 6.1         | 11.7       | 3.1            | 411.9                 | 184.2         | 7.2               | 5.2              | 2.7 | Desktop CReSS  |                                                     |
| Hsu <i>et al</i> [65]          | 2017 | own brand (non-menthol)             | 34  | ♂/♀    | 41.4 | 10.9 | >10           |             | 52.7             | 18.0        | 1.6                 | 0.8          | 32.9      |      | 21.0                | 14.7        | 12.3       | 6.6            | 690.3                 | 547.8         | 6.9               | 5.4              | 2.7 | CReSS          |                                                     |
|                                |      | own brand (menthol)                 | 71  | ♂/♀    | 43.8 | 9.3  | >10           |             | 55.7             | 18.5        | 1.8                 | 0.6          | 30.9      |      | 20.0                | 12.7        | 12.6       | 7.5            | 691.7                 | 455.9         | 6.9               | 4.8              | 2.1 | CReSS          |                                                     |

Table S1: Literature reporting puffing parameters in chronological order since 2000

| Author                         | Year | Sort                                      | n   | Gender | age  | SD   | No of cig/day | SD           | Puff volume (ml) | SD            | Puff duration (sec) | SD              | Puff flow   | SD            | Puff interval (sec) | SD                 | Puff count  | SD            | Total volume (ml/cig) | SD         | Total volume /day | Fagerström index | SD  | Device                            | Comments                                                                    |
|--------------------------------|------|-------------------------------------------|-----|--------|------|------|---------------|--------------|------------------|---------------|---------------------|-----------------|-------------|---------------|---------------------|--------------------|-------------|---------------|-----------------------|------------|-------------------|------------------|-----|-----------------------------------|-----------------------------------------------------------------------------|
| Watson <i>et al</i> [66]       | 2017 | Kent 100 (non-menthol)                    | 42  | ♂/♀    | 35.0 |      | 23.0          |              | 47.7             | SEM 1.5       | 1.2                 | SEM 0.03        | 40.8        |               |                     |                    | 14.4        | SEM 0.5       | 686.9                 |            | 15.8              |                  |     | Portable CReSS                    |                                                                             |
|                                |      | Benson & Hedges Light 100 (menthol)       | 42  | ♂/♀    | 35.0 |      | 22.0          |              | 52.2             | SEM 2.7       | 1.2                 | SEM 0.03        | 42.4        |               |                     |                    | 15.1        | SEM 0.45      | 788.2                 |            | 17.3              |                  |     | Portable CReSS                    |                                                                             |
| Bergeria <i>et al</i> [67]     | 2018 | own brand                                 | 89  | ♀      | 29.7 | 6.4  | 15.3          | 6.1          | 48.3             | 2.9           | 1.3                 | 0.1             | 36.5        | 1.4           | 20.5                | 1.0                | 14.8        | 0.6           | 716.4                 |            | 11.0              | 4.6              | 2.2 | Desktop CReSS                     |                                                                             |
|                                |      | own brand                                 | 20  | ♀      | 30.3 | 4.9  | 12.6          | 5.4          | 48.2             | 5.0           | 1.3                 | 0.1             | 35.1        | 2.4           | 23.7                | 2.6                | 14.0        | 1.4           | 674.9                 |            | 8.5               | 4.4              | 2.2 | Desktop CReSS                     | pregnant                                                                    |
| Chen <i>et al</i> [56]         | 2018 | own brand                                 | 326 | ♂/♀    | 37.6 | 11.6 | 16.5          | 8.1          | 48.3             | 14.9          | 1.6                 | 0.4             | 30.2        |               |                     |                    | 7.6         | 4.6           | 360.0                 | 222.0      | 5.5               | 4.4              | 2.3 | SPA-M                             | Pennsylvania Adult Smoking Study, same data as Krebs <i>et al</i> [55]      |
| Kim <i>et al</i> [68]          | 2018 | own brand                                 | 300 | ♂/♀    | ~30  |      | 0->20         |              | median 60.6      | IQR 49.9-73.9 | median 1.5528       | IQR 1.243-1.923 | median 40.4 | IQR 32.1-51.1 | median 8.8289       | IQR 6.5286-1.11961 | median 15.5 | IQR 13.5-19.0 | 969.6                 |            |                   |                  |     | Portable CReSS                    | IQR interquartile range                                                     |
|                                |      |                                           | 250 | ♂      | ~30  |      | 0->20         |              | median 32.7      | IQR 52.7-75.5 | median 1.6          | IQR 1.2-1.9     | median 41.2 | IQR 33.1-52.2 | median 8.9          | IQR 6.5-11.2       | median 15.5 | IQR 13-19     | 971.9                 |            |                   |                  |     | Portable CReSS                    |                                                                             |
|                                |      |                                           | 50  | ♀      | ~30  |      | 0->20         |              | median 53.5      | IQR 42-64.2   | median 1.4          | IQR 1.2-1.8     | median 36.4 | IQR 30-43.7   | median 8.3          | IQR 6.2-11         | median 17.5 | IQR 15-21     | 936.3                 |            |                   |                  |     | Portable CReSS                    |                                                                             |
| Mercincagave <i>et al</i> [58] | 2018 | own brand (non menthol)                   | 84  | ♂/♀    | 43.0 | 12.1 | 13.9          | CI 12.5-15.2 | 52.7             | CI 48.1-57.4  | 1.7                 | CI 1.6-1.8      | 31.0        |               | 26.1                | CI 23.2-28.9       | 14.7        | CI 13.6-15.9  | 744.0                 | CI 681-806 | 10.3              | 5.5              | 1.8 | CReSS                             |                                                                             |
|                                |      | SPECTRUM 400 (9 mg tar, 0.26 mg nicotine) | 84  | ♂/♀    | 43.0 | 12.1 | 16.5          | CI 14.9-18.1 | 49.4             | CI 44.4-54.3  | 1.7                 | CI 1.5-1.8      | 29.1        |               | 22.3                | CI 19.7-24.8       | 11.2        | CI 10.4-11.9  | 537.0                 | CI 479-595 | 8.9               | 5.5              | 1.8 | CReSS                             | Research cigarette with reduced nicotine content (5.2mg nicotine/g tobacco) |
|                                |      | SPECTRUM 200 (9 mg tar, 0.07 mg nicotine) | 84  | ♂/♀    | 43.0 | 12.1 | 14.8          | CI 13.2-16.5 | 50.1             | CI 45.5-54.6  | 1.8                 | CI 1.7-2.0      | 27.8        |               | 20.7                | CI 18.2-23.2       | 12.3        | CI 11.5-13.1  | 598.0                 | CI 547-649 | 8.9               | 5.5              | 1.8 | CReSS                             | Research cigarette with reduced nicotine content (1mg nicotine/g tobacco)   |
| Shiffman <i>et al</i> [69]     | 2018 | own brand                                 | 190 | ♂/♀    | 38.0 | 13.8 | 2.0           |              | 39.6             |               | 1.5                 |                 | 25.7        |               |                     |                    | 15.8        | 6.0           | 625.6                 | 209.8      | 1.2               |                  |     | Portable CReSS                    | bought, total puff time known                                               |
|                                |      | own brand                                 | 190 | ♂/♀    | 38.0 | 13.8 | 3.3           |              | 38.4             |               | 1.5                 |                 | 25.7        |               |                     |                    | 15.1        | 6.1           | 581.2                 | 227.6      | 1.9               |                  |     | Portable CReSS                    | provided for free, total puff time known                                    |
| Vansickel <i>et al</i> [70]    | 2018 | own brand                                 | 13  | ♂/♀    | 45.0 | 11.0 | 15.4          | 4            | 44.1             | 10.5          | 1.7                 | 0.4             | 28.6        | 6.1           |                     |                    |             |               |                       |            |                   |                  |     | Sodim SPA-D Smoking Puff Analyzer |                                                                             |

| Table S1: Literature reporting puffing parameters in chronological order since 2000 |      |                         |     |        |      |       |               |      |                  |              |                     |              |           |    |                     |              |            |              |                       |       |                   |                  |     |                |          |
|-------------------------------------------------------------------------------------|------|-------------------------|-----|--------|------|-------|---------------|------|------------------|--------------|---------------------|--------------|-----------|----|---------------------|--------------|------------|--------------|-----------------------|-------|-------------------|------------------|-----|----------------|----------|
| Author                                                                              | Year | Sort                    | n   | Gender | age  | SD    | No of cig/day | SD   | Puff volume (ml) | SD           | Puff duration (sec) | SD           | Puff flow | SD | Puff interval (sec) | SD           | Puff count | SD           | Total volume (ml/cig) | SD    | Total volume /day | Fagerström index | SD  | Device         | Comments |
| Yuki <i>et al</i> [71]                                                              | 2018 | own brand (~6.5 mg tar) | 20  | ♂/♀    | 30.9 | 12.5  | 17.3          | 6.6  | 58.5             | 20.2         | 1.6                 | 0.4          | 36.1      |    |                     |              | 14.6       | 4.2          | 858.0                 | 369.0 | 14.8              | 4.3              | 1.7 | Portable CReSS | Baseline |
|                                                                                     |      | own brand (~6.5 mg tar) | 20  | ♂/♀    | 30.9 | 12.5  | 17.3          | 6.6  | 58.8             | 19.0         | 1.8                 | 0.7          | 32.3      |    |                     |              | 14.6       | 3.8          | 857.0                 | 296.0 | 14.8              | 4.3              | 1.7 | Portable CReSS | day 1    |
|                                                                                     |      | own brand (~6.5 mg tar) | 20  | ♂/♀    | 30.9 | 12.5  | 17.3          | 6.6  | 62.8             | 19.2         | 1.8                 | 0.5          | 35.3      |    |                     |              | 15.2       | 3.4          | 989.0                 | 425.0 | 17.1              | 4.3              | 1.7 | Portable CReSS | day 3    |
|                                                                                     |      | own brand (~6.5 mg tar) | 20  | ♂/♀    | 30.9 | 12.5  | 17.3          | 6.6  | 56.0             | 14.4         | 1.6                 | 0.4          | 34.6      |    |                     |              | 14.2       | 3.4          | 847.0                 | 292.0 | 14.7              | 4.3              | 1.7 | Portable CReSS | day 5    |
| Watson <i>et al</i> [72]                                                            | 2019 | own brand               | 163 | ♂/♀    | 42.4 | 18-66 | 16.1          | 6-40 | 54.1             | CI 51.5-56.7 | 1.5                 | CI 1.48-1.59 | 35.4      |    | 16.8                | CI 15.2-18.5 | 11.0       | CI 9.8-12.1  | 595.1                 |       | 9.6               |                  |     | CReSS          | day 1    |
|                                                                                     |      | own brand               | 163 | ♂/♀    | 42.4 | 18-66 | 16.1          | 6-40 | 53.6             | CI 51.1-56.1 | 1.5                 | CI 1.47-1.58 | 35.3      |    | 16.3                | CI 14.7-17.9 | 14.9       | CI 13.4-16.5 | 798.6                 |       | 12.9              |                  |     | CReSS          | day 2    |

Calculated values in *italic*. SD = standard deviation, CI = 95% Confidence interval, SEM = Standard error of the mean, SE = Standard error, ♀ female, ♂ male, CRSSPT = Clinical Research Support System, Plowshare Technologies, CReSS = CReSSmicro™ (Clinical Research Support System), Plowshare Technologies. Blue: highest value. Yellow: lowest value. § Data originates from ISO/TR 17219:2013 (stated as personal communication) [73]

## References

1. Buchhalter, A.R.; Eissenberg, T. Preliminary evaluation of a novel smoking system: effects on subjective and physiological measures and on smoking behavior. *Nicotine Tob Res* 2000, 2, 39-43, doi:10.1080/14622200050011286.
2. Djordjevic, M.V.; Stellman, S.D.; Zang, E. Doses of nicotine and lung carcinogens delivered to cigarette smokers. *J. Natl. Cancer Inst.* 2000, 92, 106-111, doi:10.1093/jnci/92.2.106.
3. Breland, A.B.; Buchhalter, A.R.; Evans, S.E.; Eissenberg, T. Evaluating acute effects of potential reduced-exposure products for smokers: clinical laboratory methodology. *Nicotine Tob Res* 2002, 4 Suppl 2, S131-140, doi:10.1080/1462220021000032780.
4. Breland, A.B.; Evans, S.E.; Buchhalter, A.R.; Eissenberg, T. Acute effects of Advance: a potential reduced exposure product for smokers. *Tob. Control* 2002, 11, 376-378, doi:10.1136/tc.11.4.376.
5. Dixon, M.; Kochhar, N.; Prasad, K.; Shepperd, J.; Warburton, D.M. The influence of changing nicotine to tar ratios on human puffing behaviour and perceived sensory response. *Psychopharmacology* 2003, 170, 434-442, doi:10.1007/s00213-003-1541-8.
6. Lee, E.M.; Malson, J.L.; Waters, A.J.; Moolchan, E.T.; Pickworth, W.B. Smoking topography: reliability and validity in dependent smokers. *Nicotine Tob Res* 2003, 5, 673-679, doi:10.1080/1462220031000158645.
7. Aung, A.T.; Pickworth, W.B.; Moolchan, E.T. History of marijuana use and tobacco smoking topography in tobacco-dependent adolescents. *Addict. Behav.* 2004, 29, 699-706, doi:10.1016/j.addbeh.2004.02.012.
8. Hughes, J.R.; Hecht, S.S.; Carmella, S.G.; Murphy, S.E.; Callas, P. Smoking behaviour and toxin exposure during six weeks use of a potential reduced exposure product: Omni. *Tob. Control* 2004, 13, 175-179, doi:10.1136/tc.2003.005439.
9. Lee, E.M.; Malson, J.L.; Moolchan, E.T.; Pickworth, W.B. Quantitative comparisons between a nicotine delivery device (Eclipse) and conventional cigarette smoking. *Nicotine Tob Res* 2004, 6, 95-102, doi:10.1080/14622200310001656911.
10. Strasser, A.A.; Pickworth, W.B.; Patterson, F.; Lerman, C. Smoking topography predicts abstinence following treatment with nicotine replacement therapy. *Cancer Epidemiol. Biomarkers Prev.* 2004, 13, 1800-1804.
11. Wood, T.; Wewers, M.E.; Groner, J.; Ahijevych, K. Smoke constituent exposure and smoking topography of adolescent daily cigarette smokers. *Nicotine Tob Res* 2004, 6, 853-862, doi:10.1080/1462220042000282537.
12. Zimmerman, D.M.; Sehnert, S.S.; Epstein, D.H.; Pickworth, W.B.; Robinson, M.L.; Moolchan, E.T. Smoking topography and trajectory of asthmatic adolescents requesting cessation treatment. *Prev. Med.* 2004, 39, 940-942, doi:10.1016/j.ypmed.2004.03.032.
13. Hammond, D.; Fong, G.T.; Cummings, K.M.; Hyland, A. Smoking topography, brand switching, and nicotine delivery: results from an in vivo study. *Cancer Epidemiol. Biomarkers Prev.* 2005, 14, 1370-1375, doi:10.1158/1055-9965.EPI-04-0498.
14. Hitsman, B.; Spring, B.; Wolf, W.; Pingitore, R.; Crayton, J.W.; Hedeker, D. Effects of acute tryptophan depletion on negative symptoms and smoking topography in nicotine-dependent schizophrenics and nonpsychiatric controls. *Neuropsychopharmacology* 2005, 30, 640-648, doi:10.1038/sj.npp.1300651.
15. Strasser, A.A.; Ashare, R.L.; Kozlowski, L.T.; Pickworth, W.B. The effect of filter vent blocking and smoking topography on carbon monoxide levels in smokers. *Pharmacol. Biochem. Behav.* 2005, 82, 320-329, doi:10.1016/j.pbb.2005.09.001.
16. Tidey, J.W.; Rohsenow, D.J.; Kaplan, G.B.; Swift, R.M. Cigarette smoking topography in smokers with schizophrenia and matched non-psychiatric controls. *Drug Alcohol Depend.* 2005, 80, 259-265, doi:10.1016/j.drugalcdep.2005.04.002.
17. Breland, A.B.; Kleykamp, B.A.; Eissenberg, T. Clinical laboratory evaluation of potential reduced exposure products for smokers. *Nicotine Tob Res* 2006, 8, 727-738, doi:10.1080/14622200600789585.
18. Franken, F.H.; Pickworth, W.B.; Epstein, D.H.; Moolchan, E.T. Smoking rates and topography predict adolescent smoking cessation following treatment with nicotine replacement therapy. *Cancer Epidemiol. Biomarkers Prev.* 2006, 15, 154-157, doi:10.1158/1055-9965.EPI-05-0167.
19. Hammond, D.; Fong, G.T.; Cummings, K.M.; O'Connor, R.J.; Giovino, G.A.; McNeill, A. Cigarette yields and human exposure: a comparison of alternative testing regimens. *Cancer Epidemiol. Biomarkers Prev.* 2006, 15, 1495-1501, doi:10.1158/1055-9965.EPI-06-0047.
20. Kassel, J.D.; Greenstein, J.E.; Evatt, D.P.; Wardle, M.C.; Yates, M.C.; Veilleux, J.C.; Eissenberg, T. Smoking topography in response to denicotinized and high-yield nicotine cigarettes in adolescent smokers. *J. Adolesc. Health* 2007, 40, 54-60, doi:10.1016/j.jadohealth.2006.08.006.
21. Melikian, A.A.; Djordjevic, M.V.; Hosey, J.; Zhang, J.; Chen, S.; Zang, E.; Muscat, J.; Stellman, S.D. Gender differences relative to smoking behavior and emissions of toxins from mainstream cigarette smoke. *Nicotine Tob Res* 2007, 9, 377-387, doi:10.1080/14622200701188836.
22. Djordjevic, M.V.; Fan, J.; Ferguson, S.; Hoffmann, D. Self-regulation of smoking intensity. Smoke yields of the low-nicotine, low-'tar' cigarettes. *Carcinogenesis* 1995, 16, 2015-2021, doi:10.1093/carcin/16.9.2015.
23. Strasser, A.A.; Lerman, C.; Sanborn, P.M.; Pickworth, W.B.; Feldman, E.A. New lower nicotine cigarettes can produce compensatory smoking and increased carbon monoxide exposure. *Drug Alcohol Depend.* 2007, 86, 294-300, doi:10.1016/j.drugalcdep.2006.06.017.

24. Strasser, A.A.; Malaiyandi, V.; Hoffmann, E.; Tyndale, R.F.; Lerman, C. An association of CYP2A6 genotype and smoking topography. *Nicotine Tob Res* 2007, 9, 511-518, doi:10.1080/14622200701239605.
25. Attwood, A.S.; O'Sullivan, H.; Leonards, U.; Mackintosh, B.; Munafo, M.R. Attentional bias training and cue reactivity in cigarette smokers. *Addiction* 2008, 103, 1875-1882, doi:10.1111/j.1360-0443.2008.02335.x.
26. Collins, C.C.; Lippmann, B.M.; Lo, S.J.; Moolchan, E.T. Time spent with smoking parents and smoking topography in adolescents. *Addict. Behav.* 2008, 33, 1594-1597, doi:10.1016/j.addbeh.2008.07.003.
27. Rees, V.W.; Wayne, G.F.; Connolly, G.N. Puffing style and human exposure minimally altered by switching to a carbon-filtered cigarette. *Cancer Epidemiol. Biomarkers Prev.* 2008, 17, 2995-3003, doi:10.1158/1055-9965.EPI-07-2533.
28. Grainge, M.J.; Shahab, L.; Hammond, D.; O'Connor, R.J.; McNeill, A. First cigarette on waking and time of day as predictors of puffing behaviour in UK adult smokers. *Drug Alcohol Depend.* 2009, 101, 191-195, doi:10.1016/j.drugalcdep.2009.01.013.
29. Blank, M.D.; Disharoon, S.; Eissenberg, T. Comparison of methods for measurement of smoking behavior: mouthpiece-based computerized devices versus direct observation. *Nicotine Tob Res* 2009, 11, 896-903, doi:10.1093/ntr/ntp083.
30. Dickens, C.; McGrath, C.; Warren, N.; Biggs, P.; McAughey, J. Puffing and inhalation behaviour in cigarette smoking: Implications for particle diameter and dose. *Journal of Physics: Conference Series* 2009, 151, 012019.
31. Moolchan, E.T.; Parzynski, C.S.; Jaszyna-Gasior, M.; Collins, C.C.; Leff, M.K.; Zimmerman, D.L. A link between adolescent nicotine metabolism and smoking topography. *Cancer Epidemiol. Biomarkers Prev.* 2009, 18, 1578-1583, doi:10.1158/1055-9965.EPI-08-0592.
32. Collins, C.C.; Epstein, D.H.; Parzynski, C.S.; Zimmerman, D.; Moolchan, E.T.; Heishman, S.J. Puffing behavior during the smoking of a single cigarette in tobacco-dependent adolescents. *Nicotine Tob Res* 2010, 12, 164-167, doi:10.1093/ntr/ntp176.
33. O'Connor, R.J.; Rees, V.W.; Norton, K.J.; Cummings, K.M.; Connolly, G.N.; Alpert, H.R.; Sjodin, A.; Romanoff, L.; Li, Z.; June, K.M., et al. Does switching to reduced ignition propensity cigarettes alter smoking behavior or exposure to tobacco smoke constituents? *Nicotine Tob Res* 2010, 12, 1011-1018, doi:10.1093/ntr/ntp139.
34. June, K.M.; Norton, K.J.; Rees, V.W.; O'Connor, R.J. Influence of measurement setting and home smoking policy on smoking topography. *Addict. Behav.* 2012, 37, 42-46, doi:10.1016/j.addbeh.2011.07.039.
35. June, K.M.; Hammond, D.; Sjodin, A.; Li, Z.; Romanoff, L.; O'Connor, R.J. Cigarette ignition propensity, smoking behavior, and toxicant exposure: A natural experiment in Canada. *Tob. Induc. Dis.* 2011, 9, 13, doi:10.1186/1617-9625-9-13.
36. McKee, S.A.; Sinha, R.; Weinberger, A.H.; Sofuoglu, M.; Harrison, E.L.; Lavery, M.; Wanzer, J. Stress decreases the ability to resist smoking and potentiates smoking intensity and reward. *J Psychopharmacol* 2011, 25, 490-502, doi:10.1177/0269881110376694.
37. Strasser, A.A.; Benowitz, N.L.; Pinto, A.G.; Tang, K.Z.; Hecht, S.S.; Carmella, S.G.; Tyndale, R.F.; Lerman, C.E. Nicotine metabolite ratio predicts smoking topography and carcinogen biomarker level. *Cancer Epidemiol. Biomarkers Prev.* 2011, 20, 234-238, doi:10.1158/1055-9965.EPI-10-0674.
38. Veilleux, J.C.; Kassel, J.D.; Heinz, A.J.; Braun, A.; Wardle, M.C.; Greenstein, J.; Evatt, D.P.; Conrad, M. Predictors and sequelae of smoking topography over the course of a single cigarette in adolescent light smokers. *J. Adolesc. Health* 2011, 48, 176-181, doi:10.1016/j.jadohealth.2010.06.015.
39. Williams, J.M.; Gandhi, K.K.; Lu, S.E.; Kumar, S.; Steinberg, M.L.; Cottler, B.; Benowitz, N.L. Shorter interpuff interval is associated with higher nicotine intake in smokers with schizophrenia. *Drug Alcohol Depend.* 2011, 118, 313-319, doi:10.1016/j.drugalcdep.2011.04.009.
40. Williams, J.M.; Gandhi, K.K.; Lu, S.E.; Steinberg, M.L.; Benowitz, N.L. Nicotine intake and smoking topography in smokers with bipolar disorder. *Bipolar Disord* 2012, 14, 618-627, doi:10.1111/j.1399-5618.2012.01047.x.
41. Brinkman, M.C.; Chuang, J.C.; Gordon, S.M.; Kim, H.; Kroeger, R.R.; Polzin, G.M.; Richter, P.A. Exposure to and deposition of fine and ultrafine particles in smokers of menthol and nonmenthol cigarettes. *Inhal. Toxicol.* 2012, 24, 255-269, doi:10.3109/08958378.2012.667218.
42. Faulkner, G.E.; Arbour-Nicitopoulos, K.P.; Hsin, A. Cutting Down One Puff at a Time: The Acute Effects of Exercise on Smoking Behaviour. *Journal of Smoking Cessation* 2012, 5, 130-135, doi:10.1375/jsc.5.2.130.
43. Perkins, K.A.; Karelitz, J.L.; Giedgowd, G.E.; Conklin, C.A. The reliability of puff topography and subjective responses during ad lib smoking of a single cigarette. *Nicotine Tob Res* 2012, 14, 490-494, doi:10.1093/ntr/ntp150.
44. Matsumoto, M.; Inaba, Y.; Yamaguchi, I.; Endo, O.; Hammond, D.; Uchiyama, S.; Suzuki, G. Smoking topography and biomarkers of exposure among Japanese smokers: associations with cigarette emissions obtained using machine smoking protocols. *Environ. Health Prev. Med.* 2013, 18, 95-103, doi:10.1007/s12199-012-0293-7.
45. McClure, E.A.; Saladin, M.E.; Baker, N.L.; Carpenter, M.J.; Gray, K.M. Smoking topography and abstinence in adult female smokers. *Addict. Behav.* 2013, 38, 2833-2836, doi:10.1016/j.addbeh.2013.08.004.
46. Strasser, A.A.; Ashare, R.L.; Kaufman, M.; Tang, K.Z.; Mesaros, A.C.; Blair, I.A. The effect of menthol on cigarette smoking behaviors, biomarkers and subjective responses. *Cancer Epidemiol. Biomarkers Prev.* 2013, 22, 382-389, doi:10.1158/1055-9965.EPI-12-1097.

47. Tidey, J.W.; Rohsenow, D.J.; Kaplan, G.B.; Swift, R.M.; Ahnallen, C.G. Separate and combined effects of very low nicotine cigarettes and nicotine replacement in smokers with schizophrenia and controls. *Nicotine Tob Res* 2013, 15, 121-129, doi:10.1093/ntr/nts098.
48. Hammond, D.; O'Connor, R.J. Reduced nicotine cigarettes: smoking behavior and biomarkers of exposure among smokers not intending to quit. *Cancer Epidemiol. Biomarkers Prev.* 2014, 23, 2032-2040, doi:10.1158/1055-9965.Epi-13-0957.
49. Norton, K.J.; June, K.M.; O'Connor, R.J. Initial puffing behaviors and subjective responses differ between an electronic nicotine delivery system and traditional cigarettes. *Tob. Induc. Dis.* 2014, 12, 17, doi:10.1186/1617-9625-12-17.
50. Schneider, T.; De Jesus, S.; Prapavessis, H. The Effect of Acute Exercise on Smoking Topography: No Evidence for Cutting Down One Puff at a Time. *Journal of Smoking Cessation* 2014, 10, 146-153, doi:10.1017/jsc.2014.2.
51. Appleton, S.; Liu, J.; Lipowicz, P.J.; Sarkar, M. Effect of cigarette design on biomarkers of exposure, puffing topography and respiratory parameters. *Inhal. Toxicol.* 2015, 27, 174-180, doi:10.3109/08958378.2015.1021980.
52. Brinkman, M.C.; Kim, H.; Chuang, J.C.; Kroeger, R.R.; Deojay, D.; Clark, P.I.; Gordon, S.M. Comparison of True and Smoothed Puff Profile Replication on Smoking Behavior and Mainstream Smoke Emissions. *Chem. Res. Toxicol.* 2015, 28, 182-190, doi:10.1021/tx500318h.
53. Chung, S.; Kim, S.S.; Kini, N.; Fang, H.J.; Kalman, D.; Ziedonis, D.M. Smoking topography in Korean American and white men: preliminary findings. *J Immigr Minor Health* 2015, 17, 860-866, doi:10.1007/s10903-013-9921-6.
54. Gass, J.C.; Germeroth, L.J.; Wray, J.M.; Tiffany, S.T. The Reliability and Stability of Puff Topography Variables in Non-Daily Smokers Assessed in the Laboratory. *Nicotine Tob Res* 2016, 18, 484-490, doi:10.1093/ntr/ntv045.
55. Krebs, N.M.; Chen, A.; Zhu, J.; Sun, D.; Liao, J.; Stennett, A.L.; Muscat, J.E. Comparison of Puff Volume With Cigarettes per Day in Predicting Nicotine Uptake Among Daily Smokers. *Am. J. Epidemiol.* 2016, 184, 48-57, doi:10.1093/aje/kwv341.
56. Chen, A.; Krebs, N.M.; Zhu, J.; Muscat, J.E. Nicotine metabolite ratio predicts smoking topography: The Pennsylvania Adult Smoking Study. *Drug Alcohol Depend.* 2018, 190, 89-93, doi:10.1016/j.drugalcdep.2018.06.003.
57. Mercincavage, M.; Souprontchouk, V.; Tang, K.Z.; Dumont, R.L.; Wileyto, E.P.; Carmella, S.G.; Hecht, S.S.; Strasser, A.A. A Randomized Controlled Trial of Progressively Reduced Nicotine Content Cigarettes on Smoking Behaviors, Biomarkers of Exposure, and Subjective Ratings. *Cancer Epidemiol. Biomarkers Prev.* 2016, 25, 1125-1133, doi:10.1158/1055-9965.EPI-15-1088.
58. Mercincavage, M.; Lochbuehler, K.; Wileyto, E.P.; Benowitz, N.L.; Tyndale, R.F.; Lerman, C.; Strasser, A.A. Association of Reduced Nicotine Content Cigarettes With Smoking Behaviors and Biomarkers of Exposure Among Slow and Fast Nicotine Metabolizers: A Nonrandomized Clinical Trial. *JAMA Netw Open* 2018, 1, e181346-e181346, doi:10.1001/jamanetworkopen.2018.1346.
59. Pulcu, E. Self-report distortions of puffing topography in daily smokers. *J. Health Psychol.* 2016, 21, 1644-1654, doi:10.1177/1359105314560917.
60. Ross, K.C.; Dempsey, D.A.; St Helen, G.; Delucchi, K.; Benowitz, N.L. The Influence of Puff Characteristics, Nicotine Dependence, and Rate of Nicotine Metabolism on Daily Nicotine Exposure in African American Smokers. *Cancer Epidemiol. Biomarkers Prev.* 2016, 25, 936-943, doi:10.1158/1055-9965.EPI-15-1034.
61. Ross, K.C.; Juliano, L.M. Smoking Through a Topography Device Diminishes Some of the Acute Rewarding Effects of Smoking. *Nicotine Tob Res* 2016, 18, 564-571, doi:10.1093/ntr/ntv159.
62. Tidey, J.W.; Cassidy, R.N.; Miller, M.E. Smoking Topography Characteristics of Very Low Nicotine Content Cigarettes, With and Without Nicotine Replacement, in Smokers With Schizophrenia and Controls. *Nicotine Tob Res* 2016, 18, 1807-1812, doi:10.1093/ntr/ntw089.
63. Farris, S.G.; Aston, E.R.; Abrantes, A.M.; Zvolensky, M.J. Tobacco demand, delay discounting, and smoking topography among smokers with and without psychopathology. *Drug Alcohol Depend.* 2017, 179, 247-253, doi:10.1016/j.drugalcdep.2017.06.042.
64. Higgins, S.T.; Heil, S.H.; Sigmon, S.C.; Tidey, J.W.; Gaalema, D.E.; Stitzer, M.L.; Durand, H.; Bunn, J.Y.; Priest, J.S.; Arger, C.A., et al. Response to varying the nicotine content of cigarettes in vulnerable populations: an initial experimental examination of acute effects. *Psychopharmacology* 2017, 234, 89-98, doi:10.1007/s00213-016-4438-z.
65. Hsu, P.C.; Lan, R.S.; Brasky, T.M.; Marian, C.; Cheema, A.K.; Ransom, H.W.; Loffredo, C.A.; Pickworth, W.B.; Shields, P.G. Menthol Smokers: Metabolomic Profiling and Smoking Behavior. *Cancer Epidemiol. Biomarkers Prev.* 2017, 26, 51-60, doi:10.1158/1055-9965.EPI-16-0124.
66. Watson, C.V.; Richter, P.; de Castro, B.R.; Sosnoff, C.; Potts, J.; Clark, P.; McCraw, J.; Yan, X.; Chambers, D.; Watson, C. Smoking Behavior and Exposure: Results of a Menthol Cigarette Cross-over Study. *Am. J. Health Behav.* 2017, 41, 309-319, doi:10.5993/AJHB.41.3.10.
67. Bergeria, C.L.; Heil, S.H.; Bunn, J.Y.; Sigmon, S.C.; Higgins, S.T. Comparing Smoking Topography and Subjective Measures of Usual Brand Cigarettes Between Pregnant and Non-Pregnant Smokers. *Nicotine Tob Res* 2018, 20, 1243-1249, doi:10.1093/ntr/ntx148.

68. Kim, S.; Yu, S. Smoking Topography among Korean Smokers: Intensive Smoking Behavior with Larger Puff Volume and Shorter Interpuff Interval. *Int. J. Environ. Res. Public Health* 2018, 15, doi:10.3390/ijerph15051024.
69. Shiffman, S.; Scholl, S. Increases in Cigarette Consumption and Decreases in Smoking Intensity When Nondaily Smokers Are Provided With Free Cigarettes. *Nicotine Tob Res* 2018, 20, 1237-1242, doi:10.1093/ntr/ntx221.
70. Vansickel, A.R.; Edmiston, J.S.; Liang, Q.; Duhon, C.; Connell, C.; Bennett, D.; Sarkar, M. Characterization of puff topography of a prototype electronic cigarette in adult exclusive cigarette smokers and adult exclusive electronic cigarette users. *Regul. Toxicol. Pharmacol.* 2018, 98, 250-256, doi:10.1016/j.yrtph.2018.07.019.
71. Yuki, D.; Takeshige, Y.; Nakaya, K.; Futamura, Y. Assessment of the exposure to harmful and potentially harmful constituents in healthy Japanese smokers using a novel tobacco vapor product compared with conventional cigarettes and smoking abstinence. *Regul. Toxicol. Pharmacol.* 2018, 96, 127-134, doi:10.1016/j.yrtph.2018.05.001.
72. Watson, C.V.; Richter, P.; Li, Y.; Phillips, T.; Pickworth, W.B.; deCastro, R.B.; Potts, J.; Watson, C. Mouth Level Nicotine in a Clinical Setting versus Non-clinical Setting. *Tobacco Regulatory Science* 2019, 5, 229-241, doi:10.18001/trs.5.3.2.
73. ISO/TR 17219:2013 Review of human smoking behaviour and recommendations for a new ISO standard for the machine smoking of cigarettes; International Organisation for Standardisation: Geneva, Switzerland, 2013.
