# Supplementary material for: Characteristic Human Individual Puffing Profiles Can Generate More TNCO than ISO and Health Canada Regimes on Smoking Machine When the Same Brand Is Smoked
Source: Int J Environ Res Public Health. 2020 May 6;17(9):3225. doi: 10.3390/ijerph17093225 (PMC7246490; doi:10.3390/ijerph17093225)
Supplement: Supplementary file 1 [file ijerph-17-03225-s001.zip]

Archive with 4 entries (4 files):
- Supp file Figure S1.docx
- Supp file Figure S1.pdf
- Supp file Table S1.docx
- Supp file Table S1.pdf
